# Supplementary material
Source: PubMed Central journal article supplement (PMC6246901)
Supplement: zii999092596s1.pdf [file zii999092596s1.pdf]

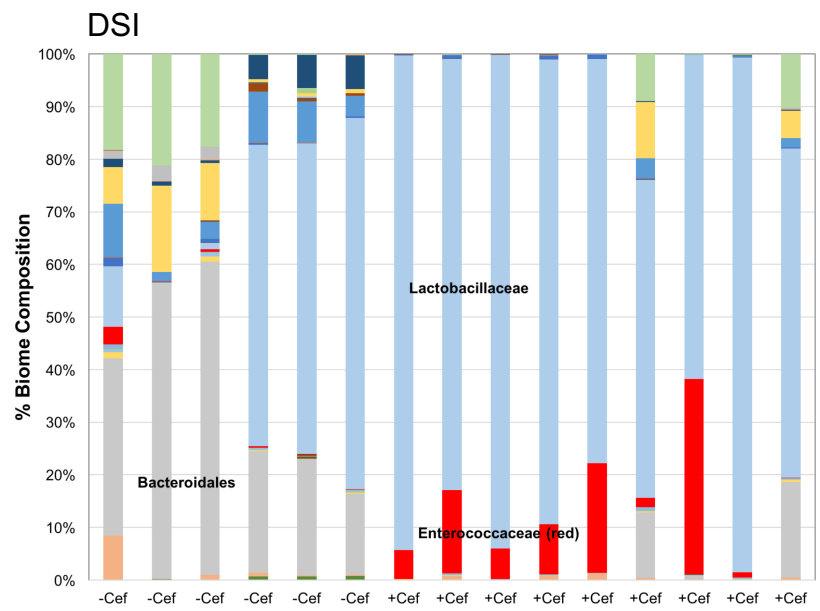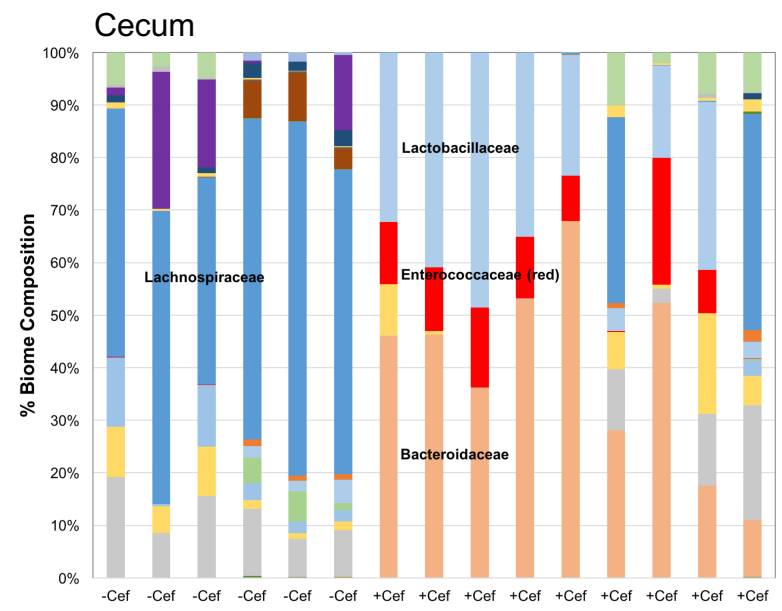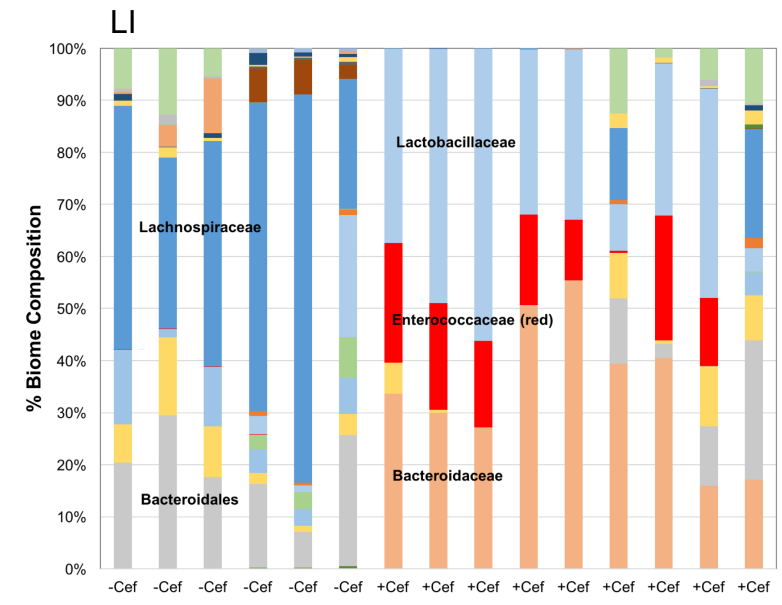

- Methanobacteriaceae
- Bifidobacteriaceae
- Frankiales
- Brevibacteriaceae
- Jonesiaceae
- Micromonosporaceae
- Solirubrobacterales
- Prevotellaceae
- Chitinophagaceae
- Chlamydiaceae
- Chloroplast
- Bacillales
- Thermoactinomycetaceae
- Lactobacillaceae
- Defluviitaleaceae
- Peptostreptococcaceae
- Veillonellaceae
- Phycisphaeraceae
- Methylobacteriaceae
- Acetobacteraceae
- Sphingomonadaceae
- Oxalobacteraceae
- Desulfovibrionaceae
- Enterobacteriaceae
- Pasteurellaceae
- Xanthomonadales
- Opitutaceae
- Acidobacteria
- Corynebacteriaceae
- Geodermatophilaceae
- Cellulomonadaceae
- Microbacteriaceae
- Nocardiodiaceae
- Bacteroidaceae
- Rikenellaceae
- Lentimicrobiaceae
- Ardenticatenia
- Cyanobacteria
- Paenibacillaceae
- Aerococcaceae
- Leuconostocaceae
- Eubacteriaceae
- Ruminococcaceae
- Fusobacteriaceae
- Caulobacteraceae
- Alcaligenaceae
- Hydrogenophilaceae
- Haliangiaceae
- Legionellaceae
- Moraxellaceae
- Spirochaetaceae
- Chthoniobacteriales
- Acidimicrobiales
- Mycobacteriaceae
- Nakamurellaceae
- Dermabacteraceae
- Micrococcaceae
- Propionibacteriaceae
- Bacteroidales
- Cytophagaceae
- Sphingobacteriaceae
- Chloroflexi
- Planococcaceae
- Carnobacteriaceae
- Streptococcaceae
- Lachnospiraceae
- Erysipelotrichaceae
- Leptotrichiaceae
- Bradyrhizobiaceae
- Burkholderiaceae
- Campylobacteraceae
- Alcanivoracaceae
- Pseudomonadaceae
- Anaeroplasmataceae
- Verrucomicrobia
- Actinomycetaceae
- Tsukamurellaceae
- Kineosporiaceae
- Intrasporangiaceae
- Sanguibacteraceae
- Coriobacteriaceae
- Porphyromonadaceae
- Flavobacteriaceae
- Sphingobacteriales
- Thermomicrobia
- Bacillaceae
- Staphylococcaceae
- Enterococcaceae
- Clostridiales
- Peptococcaceae
- Acidaminococcaceae
- Gemmatimonadetes
- Brucellaceae
- Rhodobacteraceae
- Erythrobacteraceae
- Comamonadaceae
- Rhodocyclaceae
- Helicobacteraceae
- Oceanospirillaceae
- Xanthomonadaceae
- Mollicutes
- Verrucomicrobiaceae

**Fig. S1. Relative abundance of bacterial families (in percentage) in the intestinal tracts of EF<sub>CK135</sub> colonized conventional mice in response to ceftriaxone treatment.** EF<sub>CK135</sub> colonized mice were treated with either saline or ceftriaxone and euthanized at day 4 post-first dose of ceftriaxone administration. 16S rRNA gene sequencing was performed with DNA extracted from the intestinal tissues and relative abundance of bacterial families was determined and represented here in percentage. Note that for readability purposes, these figures show data at the family level while our data (in Fig. 4F) was analyzed at the genus level.

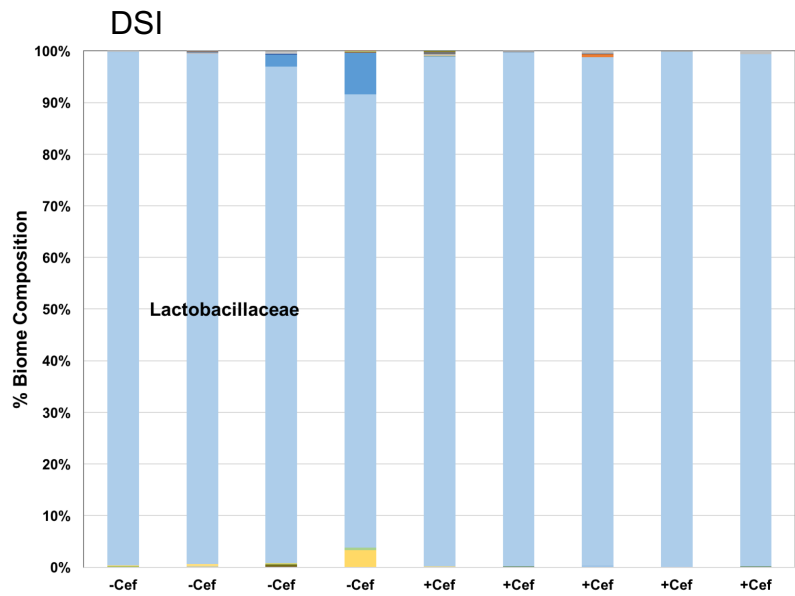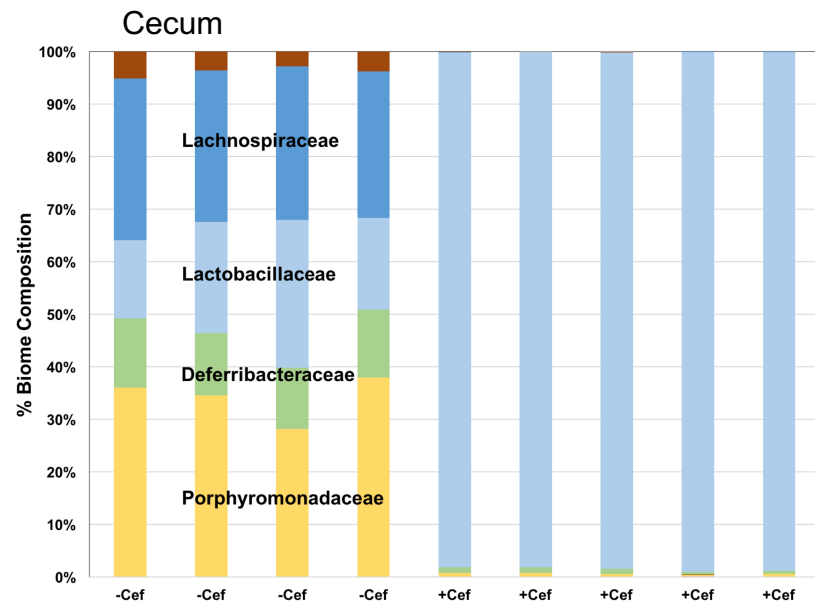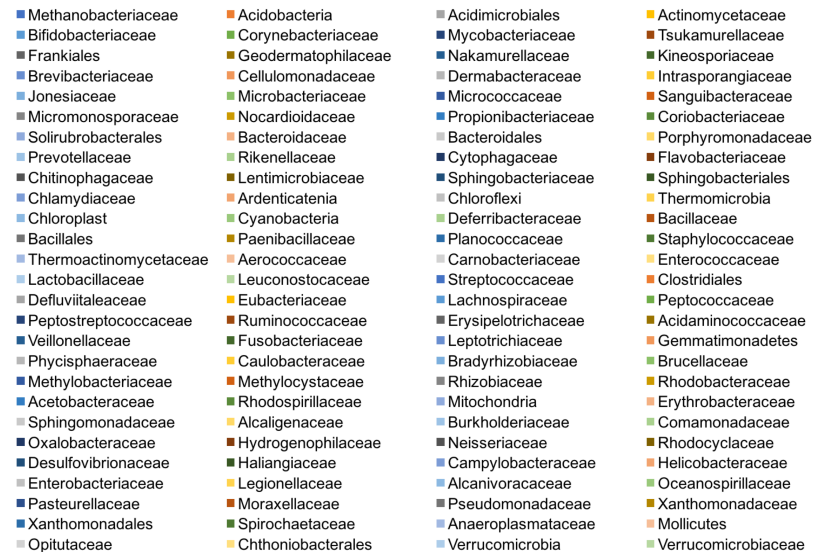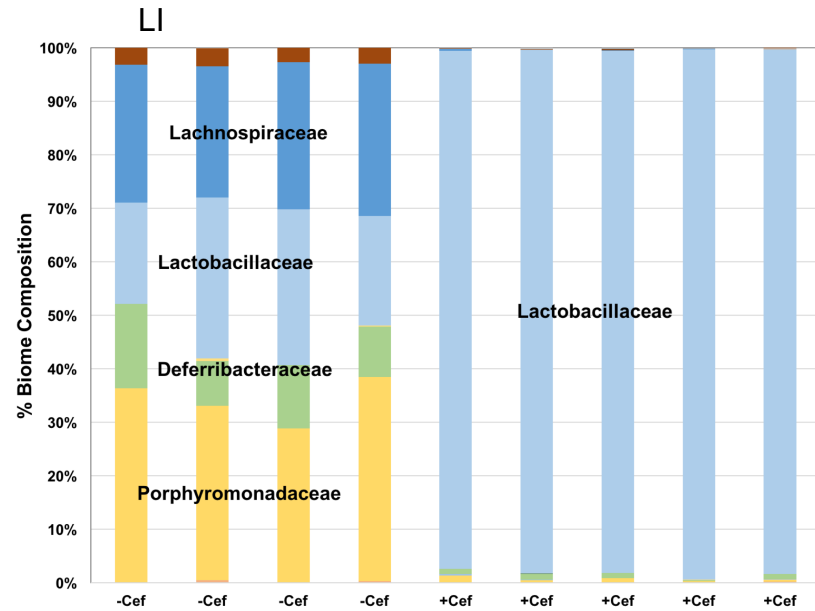

Fig. S2. Relative abundance of bacterial families (in percentage) in the intestinal tracts of defined flora mice in response to ceftriaxone treatment. Defined flora mice (lacking enterococci) were treated with either saline or ceftriaxone and euthanized at day 4 post-first dose of ceftriaxone administration. 16S rRNA gene sequencing was performed with DNA extracted from the intestinal tissues and relative abundance of bacterial families was determined and represented in percentage. *Lactobacillaceae* was found as the dominant taxa in the DSI of these mice before and after ceftriaxone treatment and in the cecum and LI after ceftriaxone administration.

Table S1. List of qRT-PCR primers to determine copy number of bacterial 16S rRNA genes or host transcripts

| Gene             | Primer             | Sequence                           | Primer conc. (nM) | Annealing temp (°C) |
|------------------|--------------------|------------------------------------|-------------------|---------------------|
| Universal        | UniF340            | 5'-ACTCCTACGGGAGGCAGCAGT-3'        | 100               | 63                  |
|                  | UniR514            | 5'-ATTACCGCGGCTGCTGGC-3'           |                   |                     |
| Cryptdin-1       | Crypt-1 FWD        | 5'-TCAAGAGGCTGCAAAGGAAGAGAAC-3'    | 200               | 60                  |
|                  | Crypt-1 REV        | 5'-TGGTCTCCATGTTTCAGCGACAGC-3'     |                   |                     |
| RegIIIy          | RegIIIy-FWD        | 5'-CCTCAGGACATCTTGTGTCTGTGCTC-3'   | 150               | 62                  |
|                  | RegIIIy-REV        | 5'-TCCACCTCTGTTGGGTTTCATAGCC-3'    |                   |                     |
| pLysozyme (pLys) | pLys-FWD           | 5'-GCCAAGGTCTAACAATCGTTGTGAGTTG-3' | 150               | 62                  |
|                  | pLys-REV           | 5'-CAGTCAGCCAGCTTGACACCACG-3'      |                   |                     |
| Muc2             | Muc2-Fwd           | 5'-GCTGACGAGTGGTTGGTGAATG-3'       | 400               | 60                  |
|                  | Muc2-Rev           | 5'-GATGAGGTGGCAGACAGGAGAC-3'       |                   |                     |
| ZO-1             | ZO-1 Fwd           | 5'-CCACCTCTGTCCAGCTCTTC-3'         | 200               | 60                  |
|                  | ZO-1 Rev           | 5'-CACCGGAGTGATGGTTTTCT-3'         |                   |                     |
| JAM-A            | JAM-A Fwd          | 5'-CTGATCTTTGACCCCGTGAC-3'         | 400               | 56                  |
|                  | JAM-A Rev          | 5'-ACCAGACGCCAAAAATCAAG-3'         |                   |                     |
| TNF- $\alpha$    | TNF- $\alpha$ Fwd  | 5'-TCCCAGGTTCTCTTCAAGGGA-3'        | 300               | 60                  |
|                  | TNF- $\alpha$ Rev  | 5'-GGTGAGGAGCACGTAGTCGG-3'         |                   |                     |
| GAPDH            | GAPDH Fwd          | 5'-GAGAACTTTGGCATTGTGG-3'          | 400               | 60                  |
|                  | GAPDH Rev          | 5'-ATGCAGGGATGATGTTCTG-3'          |                   |                     |
| $\beta$ -actin   | $\beta$ -actin Fwd | 5'-GGCTGTATTCCCCTCCATCG-3'         | 400               | 56                  |
|                  | $\beta$ -actin Rev | 5'-CCAGTTGGTAACAATGCCATGT-3'       |                   |                     |

Table S2. List of intestinal bacterial OTUs whose relative abundance was increased in ceftriaxone treated mice compared with the saline treated controls. Log change represents ratio of relative abundance of bacterial OTUs in ceftriaxone versus saline treated mice converted to a log scale. OTU identification information is included in parentheses following individual bacterial OTUs. P-values were calculated using Students' t-test. False discovery rate (q-values) are included to minimize identification of false positives during microbiome analyses.

| <b>OTU (DSI)-Day 4</b>       | <b>Avg. Saline</b> | <b>St.dev. Saline</b> | <b>Avg. Cef</b> | <b>St.dev. Cef</b> | <b>Log change (cef vs saline)</b> | <b>p-value</b> | <b>q-value</b> |
|------------------------------|--------------------|-----------------------|-----------------|--------------------|-----------------------------------|----------------|----------------|
| Enterococcus (GBKMun50)      | 1.7105234          | 0.636929233           | 2.918019        | 0.7772225          | 1.207495138                       | 0.006278       | 0.012491       |
| Lactobacillus (Unc00cd4)     | 2.1059925          | 0.882466804           | 4.125314        | 0.1495342          | 2.019315236                       | 0.002311       | 0.005714       |
| Lachnospiraceae (Unc04psg)   | 0                  | 0                     | 0.23921         | 0.2957954          | 0.239209908                       | 0.041454       | 0.047633       |
| <b>OTU (DSI)-Day 8</b>       | <b>Avg. Saline</b> | <b>St.dev. Saline</b> | <b>Avg. Cef</b> | <b>St.dev. Cef</b> | <b>Log change (cef vs saline)</b> | <b>p-value</b> | <b>q-value</b> |
| Enterococcus (GBKMun50)      | 0.2689741          | 0.537948209           | 1.315896        | 0.5629018          | 1.046922284                       | 0.026166       | 0.033886       |
| Bacteroides (GG7Spe54)       | 0.38636798         | 0.041565533           | 0.946175        | 0.3423907          | 0.559806743                       | 0.020966       | 0.028843       |
| Bifidobacterium (GWMPse11)   | 0.75081651         | 0.552096577           | 3.12227         | 0.4792632          | 2.371453291                       | 0.000482       | 0.001974       |
| Streptococcus (S53Therm)     | 0.48235648         | 0.385303399           | 1.172027        | 0.227287           | 0.689670545                       | 0.027694       | 0.035326       |
| Blautia (Unc01277)           | 0.9265062          | 0.377770924           | 2.700325        | 0.3224475          | 1.773818886                       | 0.000301       | 0.001451       |
| Lachnospiraceae (Unc01474)   | 0.74258963         | 0.150075423           | 1.205254        | 0.3011088          | 0.462664391                       | 0.02355        | 0.031444       |
| Lachnospiraceae (Unc01672)   | 1.47771494         | 0.34646108            | 2.102796        | 0.1561232          | 0.625081498                       | 0.028927       | 0.03628        |
| Clostridiales (Unc01dte)     | 0                  | 0                     | 0.768584        | 0.5048353          | 0.768583981                       | 0.02717        | 0.034997       |
| Lachnospiraceae (Unc01kix)   | 1.12977944         | 0.136184811           | 1.794126        | 0.3943489          | 0.664346175                       | 0.016321       | 0.025484       |
| Turicibacter (Unc05n97)      | 2.58233104         | 0.469163406           | 3.520004        | 0.6270846          | 0.937672566                       | 0.037336       | 0.045102       |
| Lachnospiraceae (Unc41630)   | 1.56173476         | 0.26714071            | 2.184129        | 0.2231601          | 0.622394641                       | 0.009993       | 0.016835       |
| Alistipes (Unc44045)         | 0                  | 0                     | 0.715176        | 0.4826585          | 0.715176013                       | 0.029564       | 0.036592       |
| Lachnoclostridium (UncO6361) | 0.14285135         | 0.285702698           | 1.056582        | 0.5547901          | 0.913730211                       | 0.01803        | 0.025997       |
| Lachnospiraceae (Unc89386)   | 0.51098797         | 0.341176744           | 1.192683        | 0.3543646          | 0.68169502                        | 0.023295       | 0.031209       |
| <b>OTU (DSI)-Day 14</b>      | <b>Avg. Saline</b> | <b>St.dev. Saline</b> | <b>Avg. Cef</b> | <b>St.dev. Cef</b> | <b>Log change (cef vs saline)</b> | <b>p-value</b> | <b>q-value</b> |
| Enterococcus (GBKMun50)      | 0.14436989         | 0.250055982           | 1.268096        | 0.4854756          | 1.123726328                       | 0.005075       | 0.010135       |
| Lachnoclostridium (UncO6361) | 0.98198336         | 0.45898131            | 2.558811        | 0.9109636          | 1.576827752                       | 0.017733       | 0.025832       |
| Bacteroidales (Unc00kyo)     | 0                  | 0                     | 0.586232        | 0.4111267          | 0.586232091                       | 0.033266       | 0.040116       |
| Lachnospiraceae (Unc02k9w)   | 0                  | 0                     | 0.721499        | 0.4820754          | 0.72149931                        | 0.028659       | 0.03628        |

Table S2 cont.

| <b>OTU (Cecum)-Day 4</b>     | <b>Avg. Saline</b> | <b>St.dev. Saline</b> | <b>Avg. Cef</b> | <b>St.dev. Cef</b> | <b>Log change (cef vs saline)</b> | <b>p-value</b> | <b>q-value</b> |
|------------------------------|--------------------|-----------------------|-----------------|--------------------|-----------------------------------|----------------|----------------|
| Enterococcus (GBKMun50)      | 0.5569895          | 0.599941888           | 2.87370907      | 0.9807967          | 2.316719547                       | 7.73E-05       | 0.000653887    |
| Bacteroides (GG7Spe54)       | 0.3316087          | 0.213684387           | 3.80531242      | 0.2577674          | 3.473703679                       | 1.58862E-12    | 6.31598E-10    |
| Lactobacillus (Unc00cd4)     | 0.2912832          | 0.15186304            | 3.54702331      | 0.4366218          | 3.25574012                        | 6.81238E-10    | 6.77111E-08    |
| <b>OTU (Cecum)-Day 8</b>     | <b>Avg. Saline</b> | <b>St.dev. Saline</b> | <b>Avg. Cef</b> | <b>St.dev. Cef</b> | <b>Log change (cef vs saline)</b> | <b>p-value</b> | <b>q-value</b> |
| Enterococcus (GBKMun50)      | 0                  | 0                     | 1.6902668       | 0.5953879          | 1.6902668                         | 0.003154664    | 0.007293807    |
| Bifidobacterium (GWMPse11)   | 0.1625165          | 0.325032961           | 2.34108752      | 0.5471132          | 2.178571038                       | 0.000196948    | 0.001118599    |
| Enterobacter (GWTAmn51)      | 0                  | 0                     | 1.81573983      | 0.7620556          | 1.815739829                       | 0.005973899    | 0.01136403     |
| Blautia (Unc01277)           | 0                  | 0                     | 2.98028609      | 0.5003121          | 2.980286094                       | 0.000183653    | 0.001118599    |
| Lachnoclostridium (Unc02rbn) | 2.1158569          | 0.1915214             | 2.78551167      | 0.1975817          | 0.669654764                       | 0.001558876    | 0.004334135    |
| Turicibacter (Unc05n97)      | 2.1794384          | 0.430668459           | 3.03073302      | 0.4108864          | 0.851294645                       | 0.021938861    | 0.02991761     |
| Ruminococcaceae (Unc69200)   | 0.086128           | 0.172256063           | 1.14628808      | 0.7149396          | 1.06016005                        | 0.027199921    | 0.03523511     |
| <b>OTU (Cecum)-Day 14</b>    | <b>Avg. Saline</b> | <b>St.dev. Saline</b> | <b>Avg. Cef</b> | <b>St.dev. Cef</b> | <b>Log change (cef vs saline)</b> | <b>p-value</b> | <b>q-value</b> |
| Enterococcus (GBKMun50)      | 0.1590985          | 0.275566719           | 0.7633595       | 0.3786363          | 0.604260977                       | 0.04372785     | 1              |

| <b>OTU (LI)-Day 4</b>         | <b>Avg. Saline</b> | <b>St.dev. Saline</b> | <b>Avg. Cef</b> | <b>St.dev. Cef</b> | <b>Log change (cef vs saline)</b> | <b>p-value</b> | <b>q-value</b> |
|-------------------------------|--------------------|-----------------------|-----------------|--------------------|-----------------------------------|----------------|----------------|
| Enterococcus (GBKMun50)       | 0.718051           | 0.661289418           | 2.991569        | 1.0735021          | 2.273517963                       | 0.000215359    | 0.001150764    |
| Bacteroides (GG7Spe54)        | 0.3062003          | 0.222331919           | 3.763798        | 0.1901905          | 3.457598174                       | 5.23975E-11    | 6.77111E-08    |
| Lactobacillus (Unc00cd4)      | 0.387171           | 0.256160963           | 3.67041         | 0.3715078          | 3.283239261                       | 3.47236E-11    | 6.90265E-09    |
| <b>OTU (LI)-Day 8</b>         | <b>Avg. Saline</b> | <b>St.dev. Saline</b> | <b>Avg. Cef</b> | <b>St.dev. Cef</b> | <b>Log change (cef vs saline)</b> | <b>p-value</b> | <b>q-value</b> |
| Enterococcus (GBKMun50)       | 0                  | 0                     | 1.772004        | 0.6244737          | 1.772003608                       | 0.00316017     | 0.007293807    |
| Bifidobacterium (GWMPse11)    | 0.2276964          | 0.455392874           | 2.466465        | 0.717913           | 2.238768927                       | 0.000843812    | 0.00295076     |
| Enterobacter (GWTAmn51)       | 0                  | 0                     | 2.145996        | 0.6023088          | 2.145996392                       | 0.001344871    | 0.003948508    |
| Blautia (Unc01277)            | 0.2945333          | 0.252883314           | 3.260945        | 0.4125014          | 2.966412107                       | 4.81706E-06    | 0.000137127    |
| Enterorhabdus (Unc01zsp)      | 0.808694           | 0.226549077           | 1.365798        | 0.2917835          | 0.557104452                       | 0.014571505    | 0.02219651     |
| Lachnociostriidium (Unc02rbn) | 1.9367194          | 0.163813745           | 2.522531        | 0.3245784          | 0.585812007                       | 0.012179356    | 0.01960416     |
| Turicibacter (Unc05n97)       | 2.4349946          | 0.402085192           | 3.158246        | 0.3490635          | 0.723251291                       | 0.029206208    | 0.03640033     |
| Ruminococcaceae (Unc69200)    | 0                  | 0                     | 1.359381        | 0.8969931          | 1.359380633                       | 0.027562287    | 0.03523511     |
| <b>OTU (LI)-Day 14</b>        | <b>Avg. Saline</b> | <b>St.dev. Saline</b> | <b>Avg. Cef</b> | <b>St.dev. Cef</b> | <b>Log change (cef vs saline)</b> | <b>p-value</b> | <b>q-value</b> |
| Enterococcus (GBKMun50)       | 0                  | 0                     | 1.073979        | 0.4754974          | 1.073978953                       | 0.007228654    | 0.01314479     |
| Lachnoclostridium (UncO6361)  | 0.3197894          | 0.280945886           | 2.71652         | 1.7133014          | 2.396731077                       | 0.0337221      | 0.04110619     |

Table S3. List of intestinal bacterial OTUs whose relative abundance was decreased in ceftriaxone treated mice compared with the saline treated controls. Log change represents ratio of relative abundance of bacterial OTUs in ceftriaxone versus saline treated mice converted to a log scale. OTU identification information is included in parentheses following individual bacterial OTUs. P-values were calculated using Students' t-test. False discovery rate (q-values) are included to minimize identification of false positives during microbiome analyses.

| <b>OTU (DSI)-Day 4</b>         | <b>Avg. Saline</b> | <b>St.dev. Saline</b> | <b>Avg. Cef</b> | <b>St.dev. Cef</b> | <b>Log change (cef vs saline)</b> | <b>p-value</b> | <b>q-value</b> |
|--------------------------------|--------------------|-----------------------|-----------------|--------------------|-----------------------------------|----------------|----------------|
| Bacteroidales (Unc00h6h)       | 1.903469002        | 0.232229561           | 0.2274835       | 0.453757248        | -1.675985523                      | 5.28E-07       | 1.85261E-05    |
| Desulfovibrio (Unc00hwx)       | 2.609076228        | 0.474642296           | 0.3513406       | 0.63135655         | -2.257735641                      | 3.01E-06       | 6.63907E-05    |
| Bacteroidales (Unc00krl)       | 3.34333574         | 0.21656796            | 0.9787363       | 1.204736588        | -2.364599487                      | 3.05E-04       | 0.001450681    |
| Parasutterella (Unc00mei)      | 2.687716346        | 0.673675191           | 0.6954127       | 1.382158831        | -1.992303661                      | 2.87E-03       | 0.006758691    |
| Bacteroidales (Unc00mpd)       | 2.323606912        | 0.368220485           | 0.3569782       | 0.621191826        | -1.966628698                      | 3.60E-06       | 9.57575E-05    |
| Lachnospiraceae (Unc011hu)     | 1.519066303        | 0.852006234           | 0               | 0                  | -1.519066303                      | 7.24E-03       | 0.01314479     |
| Bacteroidales (Unc16803)       | 2.938475753        | 0.081057149           | 0.8378664       | 0.939329002        | -2.100609387                      | 1.42E-04       | 0.000959561    |
| Bacteroidales (Unc58327)       | 2.657737561        | 0.329257041           | 0.2814836       | 0.446787998        | -2.376253934                      | 2.93E-08       | 1.7745E-06     |
| Bacteroidales (Unc74089)       | 1.989978136        | 0.674383474           | 0.4864203       | 0.719298192        | -1.503557791                      | 1.59E-03       | 0.00455285     |
| <b>OTU (DSI)-Day 8</b>         | <b>Avg. Saline</b> | <b>St.dev. Saline</b> | <b>Avg. Cef</b> | <b>St.dev. Cef</b> | <b>Log change (cef vs saline)</b> | <b>p-value</b> | <b>q-value</b> |
| Erysipelotrichaceae (GJ1Bac11) | 2.2380248          | 0.277808975           | 0.2335762       | 0.320763168        | -2.004448622                      | 2.27E-05       | 0.000280466    |
| Bacteroidales (Unc00h6h)       | 1.682768629        | 0.373167694           | 0.0911723       | 0.203867402        | -1.591596355                      | 1.04E-03       | 0.003436248    |
| Desulfovibrio (Unc00hwx)       | 2.043531683        | 0.670631716           | 0.1099          | 0.245743805        | -1.933631713                      | 7.03E-03       | 0.01298555     |
| Lachnospiraceae (Unc00v94)     | 1.933665423        | 0.27070271            | 0.1872238       | 0.418645141        | -1.746441624                      | 1.51E-04       | 0.000960488    |
| Bacteroidales (Unc04v7r)       | 2.660149024        | 0.269729924           | 0.7001482       | 0.681893188        | -1.960000778                      | 1.52E-03       | 0.004274294    |
| Bacteroidales (Unc05qy3)       | 3.000531663        | 0.270592721           | 1.2985508       | 0.337177336        | -1.701980878                      | 6.71E-05       | 0.000634958    |
| Lachnospiraceae (Unc05sfe)     | 3.025879159        | 0.290783358           | 1.1109734       | 0.179887862        | -1.914905719                      | 1.14E-04       | 0.000823453    |
| Bacteroidales (Unc16803)       | 2.580692994        | 0.191582769           | 1.0597937       | 0.142721968        | -1.520899341                      | 2.40E-05       | 0.000308802    |
| Bacteroidales (Unc37317)       | 2.86300901         | 0.364295986           | 1.1143897       | 0.393973652        | -1.748619356                      | 2.66E-04       | 0.001373313    |
| Bacteroidales (Unc38684)       | 2.075661231        | 0.168112965           | 0.2148485       | 0.299752124        | -1.86081275                       | 1.37E-05       | 0.000237059    |
| <b>OTU (DSI)-Day 14</b>        | <b>Avg. Saline</b> | <b>St.dev. Saline</b> | <b>Avg. Cef</b> | <b>St.dev. Cef</b> | <b>Log change (cef vs saline)</b> | <b>p-value</b> | <b>q-value</b> |
| Lachnospiraceae (Unc00v94)     | 1.759697821        | 0.067599403           | 0               | 0                  | -1.759697821                      | 4.92E-04       | 0.002031418    |
| Marvinbryantia (Unc03ak3)      | 2.368753267        | 0.241944124           | 0.2350101       | 0.525498536        | -2.133743177                      | 2.61E-04       | 0.001315611    |
| Bacteroidales (Unc16803)       | 2.740684286        | 0.126416769           | 0.5627257       | 0.586356504        | -2.177958606                      | 7.29E-04       | 0.002655886    |
| Bacteroidales (Unc38684)       | 2.125151897        | 0.321828123           | 0.4237682       | 0.436965109        | -1.7013837                        | 1.03E-03       | 0.003293779    |
| Bacteroidales (Unc58327)       | 2.707766342        | 0.098835175           | 0.3901495       | 0.569459068        | -2.317616807                      | 5.75E-04       | 0.002310727    |
| Bacteroidales (Unc74089)       | 2.276943301        | 0.067684258           | 0.3453248       | 0.357609791        | -1.931618519                      | 1.60E-04       | 0.00099693     |

Table S3. cont.

| OTU (Cecum)-Day 4            | Avg. Saline | St.dev. Saline | Avg. Cef   | St.dev. Cef | Log change (cef vs saline) | p-value  | q-value     |
|------------------------------|-------------|----------------|------------|-------------|----------------------------|----------|-------------|
| Helicobacter (JT1Muris)      | 2.489590135 | 1.400518503    | 0.08809796 | 0.136566543 | -2.401492176               | 8.37E-03 | 0.01445993  |
| Desulfovibrio (Unc00hwx)     | 2.295180115 | 0.613536789    | 0.38377764 | 0.787906318 | -1.911402471               | 1.71E-04 | 0.001048587 |
| Bacteroidales (Unc00kr)      | 2.767204326 | 0.16013478     | 1.11702056 | 1.382126195 | -1.65018377                | 7.09E-03 | 0.01298555  |
| Prevotellaceae (Unc00md9)    | 2.735566011 | 0.600953373    | 0.07395968 | 0.111081084 | -2.661606334               | 9.30E-05 | 0.00078073  |
| Bacteroidales (Unc00mpd)     | 2.075233205 | 0.287059084    | 0.57702305 | 0.904913545 | -1.498210154               | 8.83E-04 | 0.003084058 |
| Lachnospiraceae (Unc011hu)   | 1.648966048 | 0.813737806    | 0          | 0           | -1.648966048               | 4.23E-03 | 0.009068162 |
| Bacteroidales (Unc58327)     | 1.906272422 | 0.809708278    | 0.19687468 | 0.344131202 | -1.709397747               | 2.49E-03 | 0.006007972 |
| OTU (Cecum)-Day 8            | Avg. Saline | St.dev. Saline | Avg. Cef   | St.dev. Cef | Log change (cef vs saline) | p-value  | q-value     |
| Bacteroides (GG7Spe54)       | 2.635345198 | 0.063527264    | 0.32122508 | 0.350382985 | -2.314120119               | 7.91E-05 | 0.000655185 |
| Bacteroidales (Unc00h6h)     | 1.776650518 | 0.223759905    | 0          | 0           | -1.776650518               | 5.43E-04 | 0.002136713 |
| Lachnospiraceae (Unc00qjy)   | 2.830650916 | 0.185852948    | 0.05037913 | 0.112651152 | -2.780271789               | 2.67E-06 | 6.25163E-05 |
| Lachnospiraceae (Unc00v94)   | 1.633981098 | 0.201628876    | 0          | 0           | -1.633981098               | 5.11E-04 | 0.002031418 |
| Lachnospiraceae (Unc00zhm)   | 1.929935992 | 0.140019664    | 0          | 0           | -1.929935992               | 1.05E-04 | 0.00078073  |
| Roseburia (Unc013hc)         | 2.21459729  | 0.322192937    | 0.06974159 | 0.155946929 | -2.144855703               | 2.16E-04 | 0.001150764 |
| Oscillibacter (Unc0149o)     | 1.870297607 | 0.101619527    | 0.17252723 | 0.38578262  | -1.697770374               | 3.21E-04 | 0.001477075 |
| Lachnospiraceae (Unc014mj)   | 2.414007276 | 0.107651277    | 0.74879739 | 1.150873643 | -1.665209883               | 3.14E-02 | 0.03850314  |
| Ruminococcaceae (Unc018ao)   | 1.566169385 | 0.219749533    | 0          | 0           | -1.566169385               | 7.48E-04 | 0.002655886 |
| Clostridiales (Unc01w9e)     | 1.68061033  | 0.375848803    | 0          | 0           | -1.68061033                | 2.95E-03 | 0.007293807 |
| Blautia (Unc02e8n)           | 1.656456101 | 0.112229301    | 0          | 0           | -1.656456101               | 8.54E-05 | 0.000725239 |
| Blautia (Unc03n9t)           | 1.881445902 | 0.167806437    | 0.05037913 | 0.112651152 | -1.831066775               | 7.24E-06 | 0.000137127 |
| Anaeroplasm (Unc04puc)       | 1.913133825 | 0.299515777    | 0.05037913 | 0.112651152 | -1.862754698               | 4.67E-04 | 0.001974028 |
| Bacteroidales (Unc04v7r)     | 2.297849987 | 0.186801949    | 0          | 0           | -2.297849987               | 1.47E-04 | 0.000960488 |
| Bacteroidales (Unc05qy3)     | 2.913958363 | 0.105935999    | 0.20195122 | 0.192699868 | -2.712007141               | 8.46E-08 | 1.3279E-05  |
| Lachnospiraceae (Unc05sfe)   | 2.769337577 | 0.076693231    | 0.70628916 | 1.114165622 | -2.063048417               | 1.42E-02 | 0.02191742  |
| Bacteroidales (Unc16803)     | 2.508905615 | 0.300180724    | 0.50790293 | 0.146683475 | -2.00100269                | 2.10E-04 | 0.001150764 |
| Lachnospiraceae (Unc18783)   | 2.178100263 | 0.166586715    | 0          | 0           | -2.178100263               | 1.23E-04 | 0.000855724 |
| Bacteroidales (Unc37317)     | 2.703319465 | 0.203371482    | 0.10522066 | 0.235280556 | -2.598098802               | 5.02E-07 | 1.85261E-05 |
| Ruminiclostridium (Unc38007) | 1.906195689 | 0.100762221    | 0.37476022 | 0.585030265 | -1.531435466               | 3.65E-03 | 0.008157034 |
| Bacteroidales (Unc38684)     | 1.961058868 | 0.19362373     | 0.05037913 | 0.112651152 | -1.910679742               | 2.22E-05 | 0.000273194 |
| Lachnospiraceae (Unc66707)   | 1.824452662 | 0.149975821    | 0          | 0           | -1.824452662               | 1.52E-04 | 0.000960488 |
| Lachnospiraceae (Unc70129)   | 1.879097187 | 0.24536773     | 0          | 0           | -1.879097187               | 6.04E-04 | 0.002310727 |
| Lachnospiraceae (Uncide598)  | 2.217052671 | 0.161496521    | 0          | 0           | -2.217052671               | 1.06E-04 | 0.00078073  |
| OTU (Cecum)-Day 14           | Avg. Saline | St.dev. Saline | Avg. Cef   | St.dev. Cef | Log change (cef vs saline) | p-value  | q-value     |
| Lachnospiraceae (CsrSpec9)   | 1.536737926 | 0.196595896    | 0          | 0           | -1.536737926               | 5.41E-03 | 0.01059782  |
| Lachnospiraceae (Unc00v94)   | 1.605536428 | 0.09184442     | 0          | 0           | -1.605536428               | 1.09E-03 | 0.003436248 |
| Lachnospiraceae (Unc00zhm)   | 2.137564077 | 0.049222901    | 0          | 0           | -2.137564077               | 1.77E-04 | 0.001058205 |
| Oscillibacter (Unc0149o)     | 1.723252289 | 0.468940285    | 0          | 0           | -1.723252289               | 2.38E-02 | 0.03144438  |
| Alistipes (Unc01fwp)         | 2.544897423 | 0.306692279    | 0.21432705 | 0.197643169 | -2.330570374               | 1.26E-03 | 0.003863649 |
| Clostridiales (Unc01w9e)     | 1.953447505 | 0.239084145    | 0          | 0           | -1.953447505               | 4.96E-03 | 0.01002282  |
| Lachnospiraceae (Unc02pki)   | 1.58836377  | 0.102323187    | 0          | 0           | -1.58836377                | 1.38E-03 | 0.003948508 |
| Marvinbryantia (Unc03ak3)    | 2.289011257 | 0.058730994    | 0          | 0           | -2.289011257               | 2.19E-04 | 0.001150764 |
| Lachnospiraceae (Unc03imb)   | 2.480897998 | 0.756664972    | 0          | 0           | -2.480897998               | 2.96E-02 | 0.03659198  |
| Blautia (Unc03n9t)           | 2.359500529 | 0.139951635    | 0          | 0           | -2.359500529               | 1.17E-03 | 0.003596677 |
| Lachnospiraceae (Unc03t7x)   | 1.809289697 | 0.218430977    | 0          | 0           | -1.809289697               | 4.82E-03 | 0.00983391  |
| Anaeroplasm (Unc04puc)       | 2.359223339 | 0.149757783    | 0          | 0           | -2.359223339               | 1.34E-03 | 0.003902841 |
| Bacteroidales (Unc16803)     | 2.471632278 | 0.179624713    | 0.13039854 | 0.198939421 | -2.341233742               | 1.90E-05 | 0.00027062  |
| Lachnospiraceae (Unc18783)   | 2.137922167 | 0.082001497    | 0          | 0           | -2.137922167               | 4.90E-04 | 0.001974028 |
| Lachnospiraceae (Unc32085)   | 1.608329119 | 0.2980807      | 0.05611169 | 0.125469543 | -1.552217434               | 7.09E-03 | 0.01298555  |
| Lachnospiraceae (Unc36755)   | 1.513792301 | 0.227483942    | 0          | 0           | -1.513792301               | 7.44E-03 | 0.01341012  |
| Bacteroidales (Unc38684)     | 1.617588463 | 0.212387546    | 0          | 0           | -1.617588463               | 5.70E-03 | 0.01094277  |
| Bacteroidales (Unc58327)     | 2.185653604 | 0.167064867    | 0          | 0           | -2.185653604               | 1.94E-03 | 0.005131439 |
| Lachnospiraceae (Unc70129)   | 1.66209729  | 0.110283432    | 0          | 0           | -1.66209729                | 1.46E-03 | 0.004184662 |

Table S3. cont.

| OTU (LI)-Day 4                 | Avg. Saline | St.dev. Saline | Avg. Cef  | St.dev. Cef | Log change (cef vs saline) | p-value  | q-value     |
|--------------------------------|-------------|----------------|-----------|-------------|----------------------------|----------|-------------|
| Helicobacter (JT1Muris)        | 1.825817649 | 1.214099873    | 0.1173481 | 0.15366658  | -1.708469502               | 1.80E-02 | 0.02618725  |
| Desulfovibrio (Unc00hwx)       | 2.108196118 | 0.479851789    | 0.252277  | 0.75683098  | -1.855919124               | 6.08E-05 | 0.000589158 |
| Bacteroidales (Unc00krl)       | 2.946747511 | 0.341249352    | 1.0849407 | 1.43324033  | -1.861806805               | 4.35E-03 | 0.00919635  |
| Prevotellaceae (Unc00md9)      | 2.994755478 | 0.362854096    | 0.0619255 | 0.12319226  | -2.932829942               | 1.94E-06 | 5.34953E-05 |
| Bacteroidales (Unc00mpd)       | 2.299510398 | 0.488111003    | 0.6258156 | 0.93681024  | -1.673694831               | 6.34E-04 | 0.002351603 |
| Lachnospiraceae (Unc011hu)     | 1.624069931 | 0.684772899    | 0.0248111 | 0.07443326  | -1.599258845               | 2.21E-03 | 0.005595958 |
| Bacteroidales (Unc58327)       | 2.074833862 | 0.661842813    | 0.2048259 | 0.41862924  | -1.870008004               | 3.23E-04 | 0.001521651 |
| OTU (LI)-Day 8                 | Avg. Saline | St.dev. Saline | Avg. Cef  | St.dev. Cef | Log change (cef vs saline) | p-value  | q-value     |
| Bacteroides (GG7Spe54)         | 3.036439947 | 0.218969658    | 0.1617687 | 0.36172573  | -2.874671282               | 2.56E-06 | 6.25163E-05 |
| Erysipelotrichaceae (GJ1Bac11) | 1.818922968 | 0.511547875    | 0.0769916 | 0.17215844  | -1.741931371               | 4.30E-03 | 0.009133044 |
| Bacteroidales (Unc00h6h)       | 2.138285606 | 0.110205052    | 0         | 0           | -2.138285606               | 3.76E-05 | 0.000404548 |
| Lachnospiraceae (Unc00qjy)     | 2.540523759 | 0.53634478     | 0         | 0           | -2.540523759               | 2.49E-03 | 0.006007972 |
| Lachnospiraceae (Unc00zhm)     | 1.880463326 | 0.164082087    | 0         | 0           | -1.880463326               | 1.82E-04 | 0.001058205 |
| Roseburia (Unc013hc)           | 1.532401099 | 0.834070812    | 0         | 0           | -1.532401099               | 3.49E-02 | 0.04392226  |
| Oscillibacter (Unc0149o)       | 1.599076691 | 0.176805388    | 0.0528304 | 0.11813229  | -1.546246324               | 2.22E-05 | 0.000273194 |
| Lachnospiraceae (Unc014mj)     | 2.092124488 | 0.323882312    | 0.5139518 | 1.00807585  | -1.578172725               | 2.17E-02 | 0.02981082  |
| Ruminococcaceae (Unc01yw3)     | 1.540508715 | 0.301090975    | 0         | 0           | -1.540508715               | 1.99E-03 | 0.005376124 |
| Blautia (Unc03n9t)             | 1.516189805 | 0.370156011    | 0         | 0           | -1.516189805               | 3.81E-03 | 0.008872273 |
| Anaeroplasm (Unc04puc)         | 1.833794937 | 0.230485432    | 0.0769916 | 0.17215844  | -1.75680334                | 2.95E-05 | 0.000325624 |
| Bacteroidales (Unc04v7r)       | 2.455890211 | 0.225876501    | 0         | 0           | -2.455890211               | 2.13E-04 | 0.001150764 |
| Bacteroidales (Unc05qy3)       | 3.100096068 | 0.047323372    | 0.0939512 | 0.2100813   | -3.006144855               | 2.02E-06 | 5.34953E-05 |
| Lachnospiraceae (Unc05sfe)     | 2.498661443 | 0.270942193    | 0.8376895 | 0.81585411  | -1.660971958               | 7.78E-03 | 0.01380633  |
| Bacteroidales (Unc16803)       | 2.745597915 | 0.424940449    | 0.2329531 | 0.32795453  | -2.51264486                | 1.03E-04 | 0.00078073  |
| Lachnospiraceae (Unc18783)     | 1.819724667 | 0.217616677    | 0         | 0           | -1.819724667               | 4.65E-04 | 0.001954876 |
| Bacteroidales (Unc37317)       | 3.048147726 | 0.085038488    | 0.0528304 | 0.11813229  | -2.995317359               | 8.67E-10 | 1.7745E-06  |
| Bacteroidales (Unc38684)       | 2.003770256 | 0.259114619    | 0.0939512 | 0.2100813   | -1.909819044               | 2.72E-05 | 0.000308802 |
| Lachnospiraceae (Unc66707)     | 1.725732477 | 0.166798013    | 0         | 0           | -1.725732477               | 2.47E-04 | 0.001274455 |
| Lachnospiraceae (Unc70129)     | 1.559149149 | 0.309734588    | 0         | 0           | -1.559149149               | 2.09E-03 | 0.005387323 |
| Lachnospiraceae (Unide598)     | 1.930173642 | 0.391861896    | 0         | 0           | -1.930173642               | 2.22E-03 | 0.005595958 |
| OTU (LI)-Day 14                | Avg. Saline | St.dev. Saline | Avg. Cef  | St.dev. Cef | Log change (cef vs saline) | p-value  | q-value     |
| Lachnospiraceae (Unc00myz)     | 3.647032542 | 0.0669999565   | 1.5901733 | 1.44799248  | -2.05685929                | 3.35E-02 | 0.0401201   |
| Lachnospiraceae (Unc00v94)     | 1.538081194 | 0.034024411    | 0         | 0           | -1.538081194               | 1.63E-04 | 0.000997477 |
| Lachnospiraceae (Unc00zhm)     | 2.233544209 | 0.064723646    | 0         | 0           | -2.233544209               | 2.80E-04 | 0.001373313 |
| Roseburia (Unc013hc)           | 1.916071587 | 0.021855041    | 0.4064874 | 0.57039643  | -1.50958418                | 4.04E-03 | 0.008872273 |
| Alistipes (Unc01fwp)           | 2.747251401 | 0.242556234    | 0.2107066 | 0.22126932  | -2.536544803               | 1.22E-04 | 0.000855724 |
| Clostridiales (Unc01w9e)       | 1.747880758 | 0.137916766    | 0         | 0           | -1.747880758               | 2.07E-03 | 0.005376124 |
| Lachnospiraceae (Unc02pki)     | 1.657221822 | 0.052985981    | 0         | 0           | -1.657221822               | 3.41E-04 | 0.001521651 |
| Marvinbryantia (Unc03ak3)      | 2.341864134 | 0.066468763    | 0.0449847 | 0.10058879  | -2.296879462               | 3.12E-08 | 4.20339E-06 |
| Lachnospiraceae (Unc03imb)     | 2.482135584 | 0.718594299    | 0.1380963 | 0.12828198  | -2.344039253               | 2.80E-02 | 0.03605721  |
| Blautia (Unc03n9t)             | 2.423462245 | 0.088810273    | 0         | 0           | -2.423462245               | 4.47E-04 | 0.001929768 |
| Lachnospiraceae (Unc03t7x)     | 1.673319575 | 0.331306412    | 0         | 0           | -1.673319575               | 1.28E-02 | 0.0203657   |
| Anaeroplasm (Unc04puc)         | 2.299172535 | 0.09914121     | 0         | 0           | -2.299172535               | 6.19E-04 | 0.002344619 |
| Lachnospiraceae (Unc05sfe)     | 2.201634333 | 0.586926403    | 0.4183286 | 0.52158084  | -1.783305735               | 1.30E-02 | 0.02057513  |
| Bacteroidales (Unc16803)       | 2.640770358 | 0.090833952    | 0.3488702 | 0.22195045  | -2.291900121               | 1.61E-06 | 5.34953E-05 |
| Lachnospiraceae (Unc18783)     | 2.071843655 | 0.120101704    | 0         | 0           | -2.071843655               | 1.12E-03 | 0.003490595 |
| Lachnospiraceae (Unc32085)     | 1.54925203  | 0.291465156    | 0         | 0           | -1.54925203                | 1.16E-02 | 0.01889013  |
| Lachnospiraceae (Unc36755)     | 1.534865919 | 0.179870739    | 0         | 0           | -1.534865919               | 4.55E-03 | 0.009626327 |
| Bacteroidales (Unc38684)       | 1.886799807 | 0.236006063    | 0         | 0           | -1.886799807               | 5.17E-03 | 0.01023568  |
| Bacteroidales (Unc58327)       | 2.297618285 | 0.069687345    | 0         | 0           | -2.297618285               | 3.07E-04 | 0.001477075 |
| Lachnospiraceae (Unc70129)     | 1.620448288 | 0.070883135    | 0         | 0           | -1.620448288               | 6.37E-04 | 0.002351603 |
| Bacteroidales (Unc74089)       | 1.988679145 | 0.077938249    | 0.3558723 | 0.1180314   | -1.632806878               | 5.59E-07 | 4.91766E-05 |
| Lachnospiraceae (Unc89386)     | 2.104632166 | 0.193771771    | 0.5898628 | 0.72734781  | -1.514769388               | 7.45E-03 | 0.0136161   |
